# Supplementary material for: High Neutrophil–Lymphocyte Ratio and Low Lymphocyte–Monocyte Ratio Combination after Thrombolysis Is a Potential Predictor of Poor Functional Outcome of Acute Ischemic Stroke
Source: MDPI journal article supplement (doi:10.3390/jpm12081221), 2022-07-27
Supplement: s1 [file s1]

**Table S1.** Leukocyte counts and ratios at admission according to stroke etiology.

| Stroke etiology (TOAST)               | Neutrophil (G/L) | Lymphocyte (G/L) | Monocyte (G/L)   | NLR              | LMR              |
|---------------------------------------|------------------|------------------|------------------|------------------|------------------|
| Large-artery atherosclerosis (n = 62) | 4.9 (4.1-6.7)    | 1.8 (1.5-2.3)    | 0.57 (0.42-0.70) | 2.68 (1.81-3.56) | 3.56 (2.79-4.34) |
| Small-vessel occlusion (n = 103)      | 5.4 (3.8-7.4)    | 1.7 (1.2-2.3)    | 0.53 (0.43-0.71) | 3.00 (1.95-5.03) | 3.20 (2.31-4.42) |
| Cardioembolic (n = 23)                | 4.9 (3.9-6.7)    | 1.7 (1.3-1.9)    | 0.49 (0.40-0.65) | 2.89 (2.10-4.26) | 2.97 (2.63-4.24) |
| Other/undetermined (n = 97)           | 5.4 (4.2-7.2)    | 1.7 (1.2-2.3)    | 0.58 (0.47-0.68) | 3.12 (1.94-5.52) | 3.05 (2.36-4.04) |
| p value                               | 0.623            | 0.392            | 0.635            | 0.392            | 0.409            |

Data are depicted as median (interquartile range), NLR: neutrophil- lymphocyte ratio, LMR: lymphocyte- monocyte ratio, TOAST:

Trial of ORG 10172 in Acute Stroke; Statistics: Kruskal-Wallis.

**Table S2.** Leukocyte counts and ratios according to ASPECTS at admission and 24h after thrombolysis.

|                | Groups                | Neutrophil (G/L) | Lymphocyte (G/) | Monocyte (G/L)   | NLR              | LMR              |
|----------------|-----------------------|------------------|-----------------|------------------|------------------|------------------|
| On admission   | ASPECTS 10-8 (n = 5)  | 5.3 (4.1-6.9)    | 1.8 (1.3-2.3)   | 0.56 (0.45-0.69) | 2.87 (1.83-4.95) | 3.23 (2.41-4.23) |
|                | ASPECTS 7-0 (n = 151) | 6.3 (6.2-6.4)    | 1.6 (1.3-1.8)   | 0.64 (0.58-0.69) | 3.41 (3.18-4.78) | 2.56 (1.9-2.78)  |
| <i>p</i> Value |                       | 0.193            | 0.740           | 0.270            | 0.271            | 0.298            |
| At day 1       | ASPECTS 10-8 (n = 38) | 6.9 (4.9-8.3)    | 1.6 (1.3-2.1)   | 0.68 (0.53-0.89) | 3.8 (2.55-6.04)  | 2.56 (1.62-3.47) |
|                | ASPECTS 7-0 (n = 116) | 8.5 (6.4-10.3)   | 1.5 (1.0-1.9)   | 0.74 (0.61-0.92) | 5.59 (3.13-9.26) | 2.01 (1.26-2.94) |
| <i>p</i> Value |                       | 0.002            | 0.132           | 0.218            | 0.004            | 0.072            |

Data depicted as median (inter-quartile range). NLR: neutrophil-lymphocyte ratio, LMR: lymphocyte-monocyte ratio. Statistics: Mann-Whitney U test.

**Table S3.** Univariable and multivariable logistic regression analyses depicting the associations of admission NLR, LMR and other baseline characteristics with functional dependence (mRS  $\geq 2$ ) at 3 months post-event.

| Parameters                       | Univariable Logistic Regression Analysis |                | Multivariable Logistic Regression Analysis |                |
|----------------------------------|------------------------------------------|----------------|--------------------------------------------|----------------|
|                                  | OR (95%CI)                               | <i>p</i> value | OR (95%CI)                                 | <i>p</i> value |
| Age (year)                       | 1.076 (1.048-1.105)                      | 0.001          | 1.052 (1.010-1.096)                        | 0.015          |
| NLR                              | 1.046 (0.988-1.108)                      | 0.121          | 1.044 (0.894-1.219)                        | 0.584          |
| LMR                              | 0.755 (0.631-0.903)                      | 0.002          | 0.534 (0.244-1.166)                        | 0.115          |
| Atrial fibrillation <i>n</i> (%) | 1.656 (1.086-2.527)                      | 0.019          | 0.503 (0.233-1.085)                        | 0.080          |
| Hypertension <i>n</i> (%)        | 2.546 (1.079-6.007)                      | 0.033          | 0.695 (0.168-2.879)                        | 0.616          |
| NIHSS at day 1                   | 2.333 (1.757-3.098)                      | < 0.001        | 2.448 (1.537-3.898)                        | < 0.001        |
| NIHSS at day 7                   | 4.613 (2.949-7.215)                      | < 0.001        | 8.762 (4.346-17.668)                       | < 0.001        |
| Hemorrhagic transformation       | 6.874 (2.441-19.357)                     | < 0.001        | 6.608 (1.334-32.747)                       | 0.021          |
| Stroke localization              | 0.248 (0.131-0.469)                      | < 0.001        | 0.333 (0.122-0.909)                        | 0.032          |

LMR: lymphocyte-monocyte ratio. mRS: modified Rankin Scale. NIHSS: National Institutes of Health Stroke Scale. NLR: neutrophil-lymphocyte ratio.

**Table S4.** Univariable and multivariable logistic regression analyses depicting the associations of day 1 NLR, LMR and baseline characteristics with functional independence at 3 months post-event (mRS  $\geq 2$ ).

| Parameters                   | Univariable Logistic Regression Analysis |                | Multivariable Logistic Regression Analysis |                |
|------------------------------|------------------------------------------|----------------|--------------------------------------------|----------------|
|                              | OR (95%CI)                               | <i>p</i> Value | OR (95%CI)                                 | <i>p</i> Value |
| Age (year)                   | 1.076 (1.048-1.105)                      | < 0.001        | 1.056 (1.011-1.111)                        | 0.014          |
| hsCRP (g/L)                  | 1.011 (1.001-1.022)                      | 0.038          | 1.005 (0.979-1.031)                        | 0.722          |
| NLR                          | 1.417 (1.266-1.585)                      | < 0.001        | 1.416 (0.963-2.083)                        | 0.077          |
| LMR                          | 0.453 (0.347-0.591)                      | < 0.001        | 0.311 (0.103-1.413)                        | 0.056          |
| Atrial fibrillation. No. (%) | 1.656 (1.086-2.527)                      | 0.019          | 0.347 (0.191-0.981)                        | 0.033          |
| Hypertension. No. (%)        | 2.546 (1.079-6.007)                      | 0.033          | 0.541 (0.117-2.493)                        | 0.430          |
| NIHSS at day 1               | 2.333 (1.757-3.098)                      | < 0.001        | 0.925 (1.420-3.948)                        | 0.177          |
| NIHSS at day 7               | 4.613 (2.949-7.215)                      | < 0.001        | 1.537 (1.335-1.769)                        | < 0.001        |
| Hemorrhagic transformation   | 6.874 (2.441-19.357)                     | < 0.001        | 4.102 (0.589-28.579)                       | 0.154          |
| Stroke localization          | 0.248 (0.131-0.469)                      | < 0.001        | 0.393 (0.137-1.131)                        | 0.083          |

LMR: lymphocyte-monocyte ratio. mRS: modified Rankin Scale. NIHSS: National Institutes of Health Stroke Scale. NLR: neutrophil-lymphocyte ratio.
